RESEARCH ARTICLE

# Utilities of Patients with Hypertension in Northern Vietnam

Thi-Phuong-Lan Nguyen<sup>1\*</sup>, Paul F. M. Krabbe<sup>2</sup>, Thi-Bach-Yen Nguyen<sup>3</sup>, Catharina C. M. Schuiling-Veninga<sup>1</sup>, E. Pamela Wright<sup>4</sup>, Maarten J. Postma<sup>1,5</sup>

**1** Department of Pharmacy, Unit of PharmacoEpidemiology&PharmacoEconomics (PE2), University of Groningen, Antonius Deusinglaan 1, 9713AV, Groningen, The Netherlands, **2** University of Groningen, University Medical Center Groningen, Department of Epidemiology, Groningen, The Netherlands, **3** Department of Health Economic, Ha Noi University of Medicine, Ha Noi, Vietnam, **4** Medical Committee Netherlands-Vietnam, Amsterdam, The Netherlands, **5** Institute for Science in Healthy Aging & healthcaRE (SHARE), University Medical Center Groningen (UMCG), Groningen, The Netherlands

\* [ntplan75@gmail.com](mailto:ntplan75@gmail.com)

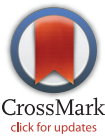

OPEN ACCESS

**Citation:** Nguyen T-P-L, Krabbe PFM, Nguyen T-B-Y, Schuiling-Veninga CCM, Wright EP, Postma MJ (2015) Utilities of Patients with Hypertension in Northern Vietnam. PLoS ONE 10(10): e0139560. doi:10.1371/journal.pone.0139560

**Editor:** Yoshihiro Kokubo, National Cardiovascular Center Hospital, JAPAN

**Received:** June 17, 2015

**Accepted:** September 15, 2015

**Published:** October 27, 2015

**Copyright:** © 2015 Nguyen et al. This is an open access article distributed under the terms of the [Creative Commons Attribution License](https://creativecommons.org/licenses/by/4.0/), which permits unrestricted use, distribution, and reproduction in any medium, provided the original author and source are credited.

**Data Availability Statement:** All relevant data are within the paper and its Supporting Information files.

**Funding:** The research was funded by the NUFFIC (Netherlands Organization for International Cooperation in Higher Education) Vietnam – Netherlands project on Preventive Medicine and a project called “Centers of Excellence for Human Resources for Health: University-based Centers to Act as Resource and Transfer Point for Development Across the Health Sector in Vietnam.” These funds support PhD research. The funders had no role in study design, data collection and analysis, decision to publish, or preparation of the manuscript.

## Abstract

### Objectives

The study aims to inform potential cost-effectiveness analysis of hypertension management in Vietnam by providing utilities and predictors of utilities in patients with hypertension.

### Methods

Hypertensive patients up to 80 years old visiting the hospital were invited to participate in a survey using Quality Metric’s Short-form 36v2<sup>TM</sup> translated into Vietnamese. Health-state utilities were estimated by applying a previously published algorithm.

### Results

The mean utility of the 691 patients interviewed was 0.73. Controlling for age, sex, blood pressure (BP) stage, and history of stroke, the utilities in older patients were lower than those in younger ones, and statistically significantly different between the extremes of youngest and oldest groups ( $p = 0.03$ ). Utility in males was higher than in females ( $p = 0.002$ ). As expected, patients with a history of stroke appeared to exhibit lower utilities than patients without such history, but the difference was not statistically significant ( $p = 0.73$ ). Patients with more than three comorbidities did have lower utilities than patients without comorbidity ( $p = 0.01$ ).

### Conclusions

Health-state utilities found among hypertensive patients in Vietnam were similar to those found in other international studies. It is suggested that lower of health-state utilities exist among those patients who were older, female or had more than three comorbidities in comparison with respective reference groups. However, further research for confirmation is required. The data from this study provide a potential reference on health-state utilities of hypertensive patients in Vietnam as an input for future cost-effectiveness analysis of

**Competing Interests:** The authors have no competing interests to declare.

interventions. Also, it may serve as a reference for other similar populations, especially in the context of similar environments in low income countries.

## Introduction

Hypertension and its complications represent key public health problems around the world especially among older adults. More than 40% of hypertensive person are older than 25 years [1]. Every year, 9.4 million deaths occur due to complications of hypertension [2]. Globally, diagnosis and treatment are relatively accessible and affordable, but even when patients are on treatment, there are health risks in the long term.

Different outcome measures can be applied to assess the effects of diagnosis and treatment, including health-state utilities, which are also core inputs for cost-effectiveness analysis of disease management. Notably, detailed measurements of utilities of hypertensive patients can support health economic evaluations of planned hypertension management programs. Currently, only limited information on health-state utilities of hypertensive patients is available for Asian countries, including Vietnam.

In many countries, the Short-form 36 version 2<sup>TM</sup> (SF-36v2) questionnaire, as developed by Quality Metrics, has been applied to collect data on health-related quality of life (HRQoL) [3]. This instrument has also been applied for hypertensive patients in various countries [4–11], enhancing plausibility and acceptability of cross-country comparisons of HRQoL [9, 12, 13]. In Asia this instrument has already been validated in China, Singapore, Korea and the Philippines [14–17] which enhances plausibility that it is suitable for use in Vietnam.

In this study, we use SF-36v2<sup>TM</sup> data from patients visiting a hospital out-patient clinic in an urban setting in Northern Vietnam to measure their HRQoL expressed in utilities. Furthermore, we aim to evaluate differences in health-state utilities related to characteristics of these patients to identify potential predictors.

## Methods

### Setting

We conducted the survey from April to May 2013 among patients attending the hypertension unit of the outpatient clinic in Thai Nguyen General Hospital; further details are described elsewhere [18]. The patients included new and existing cases coming to the outpatient clinic for the management of their hypertension.

### Participants

All confirmed hypertensive patients who were able to read and write, were no more than 80 years old and were willing to participate in this study were recruited. We invited patients to take the survey while they were waiting for examination; interviewers collected the data in the outpatient clinic. As one of our purposes was to investigate the relation between utilities and different patient characteristics, only records with full information were included in the analysis. Among 722 cases agreed to provide data, 712 records had full information on patients' characteristic. Finally, 691 cases were complete and could be used to calculate health utility.

### Procedures and measurements

Five researchers of Thai Nguyen University of Medicine and Pharmacy were trained to interview patients. Notably, interviewers were trained in basic interview skills and structuring the interview in line with the contents of questionnaire. There was a practice section to make sure

they have similar understanding and consistent applications of the questionnaire. Currently, only scarce evidence and recommendation exist on what methods to use for measuring health utilities specially among hypertensive population. Notably, the algorithm produced by Brazier et al. used original valuation of SF-36v2<sup>TM</sup> data, without potential errors related to mapping [19]. This model has also previously been shown to explain a reasonable share of variance (approximately 60%) and is considered sensitive in the measurement of impacts on health, especially in those cases when only relatively small differences in health are expected [19], as in the case of hypertension management. Given these advantages, this model was used to estimate health utilities based on SF-36v2<sup>TM</sup> data in this study.

We applied the Quality Metric Short Form, SF-36v2<sup>TM</sup>, translated into Vietnamese, to collect data on health status. Health-state utilities were estimated by applying the previous derived algorithm [19]. For this model, eleven specific items of SF-36 were selected to estimate health-state utilities: in the physical domain, items number 3, 4 and 12 were included; in the role domain, items number 15 and 18; item number 32 in the social domain; items number 21 and 22 in the pain domain; items number 24 and 28 in the mental domain; and item number 27 in the vitality domain. Utilities were subsequently estimated based on responses elicited by standard gambling techniques [19]. Several steps to obtain health utilities values within the algorithm are presented in [S1 Appendix](#).

During interviews we collected data on patient characteristics such as age, gender, occupation and ethnicity. Blood pressure (BP) was measured once at the time of the medical examination. Other health status parameters were collected from hard copies of medical records, including comorbidities such as diabetes, gout, heart valve disease, peripheral artery disease, chronic arthritis, lipid metabolism disorder, coronary artery disease, other chronic diseases, and history of stroke as a complication of hypertension.

## Statistical analysis

Descriptive listings, including percentages, frequencies, means and SDs for the various groups distinguished, were computed. We also applied independent t-tests, one-way ANOVA test to test the significance of differences in mean utilities between groups. Finally, multiple regression was applied to estimate influences of the individual variables on health-state utilities, using adjusted odds ratios (ORs).

## Ethical considerations

This study was approved by the ethical committee of the Thai Nguyen General Hospital. When patients were invited to join the study, the purpose was explained to them and they were told they could choose to join or not, and could stop the interview at any time. Those patients who did agree to provide the information gave verbal consent to the interviewer.

## Results

### Main characteristics of patients

The main characteristics of the 712 patients who met the inclusion criteria and joined the study are presented in [Table 1](#). Patients' ages ranged from 41 to 80 years; half belonged to the group 60–69 years and 56% was female. Only 10% of patients still worked for wages. Among the patients, 66% did not meet their target BP at the time of the survey, while 70% had comorbidities and 11% had a history of stroke. The components of comorbidities was presented in [S1 Table](#).

**Table 1. Characteristics of patients included in the study (n = 712).**

| Characteristics                              | Number (%)      |
|----------------------------------------------|-----------------|
| <b>Age (years)</b>                           |                 |
| 41–49                                        | 12 (1.7)        |
| 50–59                                        | 142 (19.9)      |
| 60–69                                        | 367 (51.5)      |
| 70–80                                        | 191 (26.8)      |
| <b>Sex</b>                                   |                 |
| Male                                         | 314 (44.1)      |
| <b>Working status</b>                        |                 |
| Being retired or doing housework             | 637 (89.5)      |
| Working and earning money                    | 75 (10.5)       |
| <b>Ethnicity</b>                             |                 |
| Kinh                                         | 651 (91.4)      |
| Others                                       | 61 (8.6)        |
| <b>Stage of BP at the time of survey</b>     |                 |
| Target-BP                                    | 242 (34.0)      |
| Stage one                                    | 360 (50.6)      |
| Stage two                                    | 110 (15.4)      |
| <b>Comorbidity</b>                           |                 |
| Comorbidity(ies)                             | 500 (70.2)      |
| <b>Stroke</b>                                |                 |
| History of stroke                            | 78 (11)         |
| <b>Health-state utility</b>                  |                 |
| Health-state utility (mean +/- SD (n = 691)) | 0.73 (+/- 0.14) |

Note: Health utility was calculated in 691 patients, as syntax of transferring SF-36 data to utility did not work in 21 cases (3%) with missing value of any one of the items in the SF-36 form.

doi:10.1371/journal.pone.0139560.t001

## Health-state utilities

Mean utility was estimated at 0.73 (+/- 0.14) in this hypertensive population. Mean health-state utilities were significantly different with respect to gender and age groups (all  $p < 0.01$ ). [Table 2](#) shows that relatively higher BP appeared to be associated with lower health-state utility at 0.73, 0.73 and 0.71 in the groups with target BP, stage one and stage two, respectively. However, these differences were not statistically significant ( $p = 0.42$ ). Regarding comorbidities or history of stroke, we did not find significant differences between the mean health-state utilities of these groups ([Table 2](#)).

Controlling for other factors with adjusted ORs, we found that utilities in patients from 70 to 80 years old were lower than those of the younger groups; the difference between the oldest and youngest groups was statistically significant ([Table 3](#);  $p = 0.03$ ). Health-state utility in males was higher than in females even after adjustment for other factors ( $p = 0.002$ ). Patients with a history of stroke exhibited an apparently lower health-state utility than patients without stroke, but the difference was not statistically significant ( $p = 0.79$ ). Patients with more than three comorbidities had lower utilities than patients with no comorbidity, after adjustment ( $p = 0.01$ ).

**Table 2. Distribution of health-state utilities by patients' characteristic (n = 691).**

| Characteristics                          | Mean  | Standard deviation | P value |
|------------------------------------------|-------|--------------------|---------|
| <b>Age (years)</b>                       |       |                    | 0.004   |
| 41–49                                    | 0.787 | 0.16               |         |
| 50–59                                    | 0.749 | 0.14               |         |
| 60–69                                    | 0.730 | 0.14               |         |
| 70–80                                    | 0.700 | 0.13               |         |
| <b>Sex</b>                               |       |                    | 0.005   |
| Male                                     | 0.743 | 0.14               |         |
| Female                                   | 0.713 | 0.14               |         |
| <b>Stage of BP at the time of survey</b> |       |                    | 0.422   |
| Target-BP                                | 0.734 | 0.14               |         |
| Stage one                                | 0.726 | 0.13               |         |
| Stage two                                | 0.712 | 0.15               |         |
| <b>Comorbidity</b>                       |       |                    | 0.717   |
| No comorbidity                           | 0.729 | 0.14               |         |
| Comorbidity(ies)                         | 0.725 | 0.14               |         |
| <b>History of stroke</b>                 |       |                    | 0.729   |
| No stroke                                | 0.727 | 0.14               |         |
| Stroke                                   | 0.721 | 0.15               |         |

doi:10.1371/journal.pone.0139560.t002

## Discussion

This study aimed to fill gaps in the evidence on utilities for populations with high BP in low- and middle-income countries, in particular Vietnam. Accurate utility scores are crucial for a planned analysis of cost-effectiveness of disease management.

The mean utilities of our population of hypertensive patients are somewhat lower than the utilities of the general population in Vietnam. For example, the health-state utility of an older population in a rural community in Vietnam, measured by EQ-5D, was 0.88 while the utility in our population was 0.73 [20]. However, this comparison should be interpreted with caution as the studies used different instruments to measure utility [9, 12, 13]. Also, in comparison with other populations in Asian countries, estimated health-state utility is lower in our hypertensive population. For example, a general population in Singapore had mean health-state utility of 0.80 (+/-0.12), using the same method for health-state utility measurement [21].

Differences in utilities seem associated with age, gender, and a high number of comorbidities. However, no such statistically significant differences are found among BP-stages or with presence of history of stroke. Health-state utility among these hypertensive patients differed from an Australian study in which the utility of 0.63 was lower than the utility of 0.73 in our population, using the same instrument and method [22]. However, the population in that study consisted of prisoners and persons with an impaired mental health status, which may explain the lower health-state utilities. Results in other studies vary in health-state utility. For example, health-state utility in a hypertensive population (Beaver Dams study) was 0.72 or 0.83, measured with the Quality of Well-Being (QWB) and time trade-off (TTO) methods, respectively [13]. In a Swedish population with high BP, health-state utility was 0.73 when using a rating scale and 0.81 when using TTO [6]. In a Nigerian hypertensive population, it was relevantly lower at 0.35(+/-0.42), using the HUI3 method [23]. Again, these comparisons should be interpreted cautiously because different instruments and methods were applied [6]. Finally, in contrast with the aforementioned Nigerian study, in our study, health-state utilities

**Table 3. Predictors of health-state utilities in hypertensive patients (n = 691).**

|                                          | OR     | 95% CI      |             | p     |
|------------------------------------------|--------|-------------|-------------|-------|
|                                          |        | Lower bound | Upper bound |       |
| <b>Age (years)</b>                       |        |             |             |       |
| 41–49 (ref)                              |        |             |             |       |
| 50–59                                    | -0.04  | -0.12       | 0.04        | 0.34  |
| 60–69                                    | -0.06  | -0.13       | 0.02        | 0.16  |
| 70–80                                    | -0.09  | -0.17       | -0.01       | 0.03  |
| <b>Sex</b>                               |        |             |             |       |
| Male (ref)                               |        |             |             |       |
| Female                                   | -0.03  | -0.05       | -0.01       | 0.002 |
| <b>Stage of BP at the time of survey</b> |        |             |             |       |
| Target-BP (ref)                          |        |             |             |       |
| BP Stage one                             | -0.01  | -0.03       | 0.01        | 0.43  |
| BP stage two                             | -0.02  | -0.05       | 0.02        | 0.32  |
| <b>Stroke</b>                            |        |             |             |       |
| No history of stroke (ref)               |        |             |             |       |
| History of stroke                        | -0.004 | -0.04       | 0.03        | 0.79  |
| <b>Comorbidity</b>                       |        |             |             |       |
| No comorbidity (ref)                     |        |             |             |       |
| One comorbidity                          | 0.01   | -0.02       | 0.03        | 0.53  |
| Two comorbidities                        | -0.004 | -0.03       | 0.03        | 0.81  |
| Three comorbidities                      | -0.04  | -0.08       | 0.02        | 0.20  |
| > Three comorbidities                    | -0.11  | -0.18       | -0.03       | 0.01  |

doi:10.1371/journal.pone.0139560.t003

do not significantly differ for different BP-levels. The methods of analysis between these two studies differed, with BP specified as a continuous variable in the Nigerian study but as a categorical one in our study [23]. In addition, in our study BP was measured only once at the time of examination; we do not know adherence to medication in this population or whether target-BP was achieved.

As expected, patients with a history of stroke have lower utilities than those without such a history in our study, however lacking statistical significance (likely due to relatively small numbers) [23]. Our finding that history of stroke does not significantly predicts utilities in our study population is in line with a similar study in a Swedish population [6]. Next to small numbers, a further reason may be that severity of health impacts and complications after stroke were relatively mild and all patients generally recovered.

In general, older patients have lower utilities than younger ones in our study. When controlling for sex and health status, the only significant difference found is between the oldest group and youngest group. Obviously and in general, utility decreases with age and in other studies it has indeed been quantified that each year of increasing age was reported to reduce health-state utility [22, 23]. In line with other studies, males have 0.03 higher mean health-state utility than females [22, 23]. We find an association between comorbidities and utilities, but this association is only manifest for patients having more than three comorbidities. In the Australian study, researchers reported that each increase in the number of comorbidities was associated with reduced utility [22]. It should be noted that our results appear without controlling for other variables that may affect HRQoL, such as body mass index, educational level, smoking, marital status, income/socioeconomic factors, serious events in the past, antihypertensive drugs, household position and awareness of hypertension [5, 9, 11, 20, 22, 24–27].

Regarding the limitations of the study, it should be mentioned that reliability and validity of applying the equation to obtain utilities from SF-36 in Vietnam should be investigated further, as it was developed for a Western population. We should be aware of potential similar problems as reported for other instruments [28, 29]. However, it has already been used in other Asian countries [21, 30] and currently does seem the optimal approach, most likely being acceptable for our measurements. In Vietnam, hypertension also occurs below the age of 40 years. However, we limited our study to 40 and over as younger patients were not available in the survey. Despite specific questions in the questionnaire, we were unable to get reliable estimates on the exact number of years since diagnosis of hypertension. Patients seemed unable to exactly recall year of diagnosis. Therefore, an analysis on the relationship between health utilities, duration, seriousness of progressive disease and burden of comorbidities overtime could not be performed in this study. Finally, due to scarce resources, capacity and funds, data collection lasted only two months, which may have influenced the type of patients included with respect to how they managed their hypertension in this specific hospital.

## Conclusions

Health-state utilities found among hypertensive patients in Vietnam were similar to those found in other international studies. It is suggested that lower of health-state utilities exist among those patients who were older, female or had more than three comorbidities in comparison with respective reference groups. However, further research for confirmation is required. The data from this study provide a potential reference on health-state utilities of hypertensive patients in Vietnam as an input for future cost-effectiveness analysis of interventions. Also, it may serve as a reference for other similar populations, especially in the context of similar environments in low income countries.

## Supporting Information

**S1 Appendix. Steps to quantify health utilities from SF-36 data.**

(DOCX)

**S1 Dataset. SF-36 data\_Plos One paper.**

(SAV)

**S1 Table. Prevalence of comorbidities among 712 hypertensive patients.**

(DOCX)

## Acknowledgments

Our thanks go to the Outpatient Department at Thai Nguyen General Hospital for their cooperation during the study. We also thank Professor John E Brazier for providing the algorithm to transfer SF-36v2<sup>TM</sup> to health-state utilities score.

## Author Contributions

Conceived and designed the experiments: TPLN TBYN MJP. Performed the experiments: TPLN TBYN. Analyzed the data: TPLN MJP. Contributed reagents/materials/analysis tools: TPLN TBYN MJP. Wrote the paper: TPLN PFMK TBYN CCMSV EPW MJP. Edited final version of the manuscript: EPW.



## References

1. WHO. A global brief on Hypertension—Silent killer, global public health crisis. 2013. Available: [http://apps.who.int/iris/bitstream/10665/79059/1/WHO\\_DCO\\_WHD\\_2013.2\\_eng.pdf](http://apps.who.int/iris/bitstream/10665/79059/1/WHO_DCO_WHD_2013.2_eng.pdf).
2. Lim SS, Vos T, Flaxman AD, Danaei G, Shibuya K, Adair-Rohani H, et al. A comparative risk assessment of burden of disease and injury attributable to 67 risk factors and risk factor clusters in 21 regions, 1990–2010: a systematic analysis for the Global Burden of Disease Study 2010. *Lancet*. 2012; 380(9859):2224–60. Epub 2012/12/19. S0140-6736(12)61766-8. doi: [10.1016/S0140-6736\(12\)61766-8](https://doi.org/10.1016/S0140-6736(12)61766-8) PMID: [23245609](https://pubmed.ncbi.nlm.nih.gov/23245609/); PubMed Central PMCID: PMC4156511.
3. John E. Ware J. SF-36® Health Survey Update. 2013. Available: <http://www.sf-36.org/tools/SF36.shtml>.
4. Aydemir O, Ozdemir C, Koroglu E. The impact of co-morbid conditions on the SF-36: a primary-care-based study among hypertensives. *Arch Med Res*. 2005; 36(2):136–41. Epub 2005/04/26. S0188-4409(04)00187-0. doi: [10.1016/j.arcmed.2004.12.009](https://doi.org/10.1016/j.arcmed.2004.12.009) PMID: [15847946](https://pubmed.ncbi.nlm.nih.gov/15847946/).
5. Banegas JR, Guallar-Castillon P, Rodriguez-Artalejo F, Graciani A, Lopez-Garcia E, Ruilope LM. Association between awareness, treatment, and control of hypertension, and quality of life among older adults in Spain. *Am J Hypertens*. 2006; 19(7):686–93. Epub 2006/07/04. S0895-7061(06)00106-3. doi: [10.1016/j.amjhyper.2006.01.015](https://doi.org/10.1016/j.amjhyper.2006.01.015) PMID: [16814122](https://pubmed.ncbi.nlm.nih.gov/16814122/).
6. Bardage C, Isacson D, Ring L, Bingefors K. A Swedish population-based study on the relationship between the SF-36 and health utilities to measure health in hypertension. *Blood Press*. 2003; 12(4):203–10. Epub 2003/11/05. PMID: [14596356](https://pubmed.ncbi.nlm.nih.gov/14596356/).
7. Bardage C, Isacson DG. Hypertension and health-related quality of life. an epidemiological study in Sweden. *J Clin Epidemiol*. 2001; 54(2):172–81. Epub 2001/02/13. S0895-4356(00)00293-6. PMID: [11166533](https://pubmed.ncbi.nlm.nih.gov/11166533/).
8. Gusmao JL, Mion D Jr., Pierin AM. Health-related quality of life and blood pressure control in hypertensive patients with and without complications. *Clinics (Sao Paulo)*. 2009; 64(7):619–28. Epub 2009/07/17. S1807-59322009000700003. doi: [10.1590/S1807-59322009000700003](https://doi.org/10.1590/S1807-59322009000700003) PMID: [19606236](https://pubmed.ncbi.nlm.nih.gov/19606236/); PubMed Central PMCID: PMC2710433.
9. Lawrence WF, Fryback DG, Martin PA, Klein R, Klein BE. Health status and hypertension: a population-based study. *J Clin Epidemiol*. 1996; 49(11):1239–45. Epub 1996/11/01. S0895-4356(96)00220-X. PMID: [8892491](https://pubmed.ncbi.nlm.nih.gov/8892491/).
10. Mena-Martin FJ, Martin-Escudero JC, Simal-Blanco F, Carretero-Ares JL, Arzuola-Mouronte D, Herberos-Fernandez V. Health-related quality of life of subjects with known and unknown hypertension: results from the population-based Ortega study. *J Hypertens*. 2003; 21(7):1283–9. Epub 2003/06/21. doi: [10.1097/01.hjh.0000059086.43904.17](https://doi.org/10.1097/01.hjh.0000059086.43904.17) PMID: [12817174](https://pubmed.ncbi.nlm.nih.gov/12817174/).
11. Li W, Liu L, Puente JG, Li Y, Jiang X, Jin S, et al. Hypertension and health-related quality of life: an epidemiological study in patients attending hospital clinics in China. *J Hypertens*. 2005; 23(9):1667–76. Epub 2005/08/12. 00004872-200509000-00010. PMID: [16093911](https://pubmed.ncbi.nlm.nih.gov/16093911/).
12. Kaplan RM, Groessl EJ, Sengupta N, Sieber WJ, Ganiats TG. Comparison of measured utility scores and imputed scores from the SF-36 in patients with rheumatoid arthritis. *Med Care*. 2005; 43(1):79–87. Epub 2005/01/01. 00005650-200501000-00011. PMID: [15626937](https://pubmed.ncbi.nlm.nih.gov/15626937/).
13. Fryback DG, Dasbach EJ, Klein R, Klein BE, Dom N, Peterson K, et al. The Beaver Dam Health Outcomes Study: initial catalog of health-state quality factors. *Med Decis Making*. 1993; 13(2):89–102. Epub 1993/04/01. PMID: [8483408](https://pubmed.ncbi.nlm.nih.gov/8483408/).
14. Zhou KN, Zhang M, Wu Q, Ji ZH, Zhang XM, Zhuang GH. Reliability, validity and sensitivity of the Chinese (simple) short form 36 health survey version 2 (SF-36v2) in patients with chronic hepatitis B. *J Viral Hepat*. 2013; 20(4):e47–55. Epub 2013/03/16. doi: [10.1111/jvh.12030](https://doi.org/10.1111/jvh.12030) PMID: [23490389](https://pubmed.ncbi.nlm.nih.gov/23490389/).
15. Thumboo J, Wu Y, Tai ES, Gandek B, Lee J, Ma S, et al. Reliability and validity of the English (Singapore) and Chinese (Singapore) versions of the Short-Form 36 version 2 in a multi-ethnic urban Asian population in Singapore. *Qual Life Res*. 2013; 22(9):2501–8. Epub 2013/03/12. doi: [10.1007/s11136-013-0381-1](https://doi.org/10.1007/s11136-013-0381-1) PMID: [23475690](https://pubmed.ncbi.nlm.nih.gov/23475690/).
16. Kim SH, Jo MW, Lee SI. Psychometric properties of the Korean short form-36 health survey version 2 for assessing the general population. *Asian Nurs Res (Korean Soc Nurs Sci)*. 2013; 7(2):61–6. Epub 2014/07/18. S1976-1317(13)00017-0. doi: [10.1016/j.anr.2013.03.001](https://doi.org/10.1016/j.anr.2013.03.001) PMID: [25029923](https://pubmed.ncbi.nlm.nih.gov/25029923/).
17. Castillo-Carandang NT, Sison OT, Grefal ML, Sy RG, Alix OC, Llanes EJ, et al. A community-based validation study of the short-form 36 version 2 Philippines (Tagalog) in two cities in the Philippines. *PLoS One*. 2013; 8(12):e83794. Epub 2014/01/05. PONE-D-13-13719. doi: [10.1371/journal.pone.0083794](https://doi.org/10.1371/journal.pone.0083794) PMID: [24386281](https://pubmed.ncbi.nlm.nih.gov/24386281/); PubMed Central PMCID: PMC3873385.
18. Nguyen TP, Nguyen TB, Nguyen TT, Vinh Hac V, Le HH, Schuiling-Veninga C, et al. Direct costs of hypertensive patients admitted to hospital in Vietnam- a bottom-up micro-costing analysis. *BMC Health*



- Serv Res. 2014; 14:514. Epub 2014/10/29. s12913-014-0514-4. doi: [10.1186/s12913-014-0514-4](https://doi.org/10.1186/s12913-014-0514-4) PMID: [25348043](https://pubmed.ncbi.nlm.nih.gov/25348043/); PubMed Central PMCID: PMC4221683.
19. Brazier J, Roberts J, Deverill M. The estimation of a preference-based measure of health from the SF-36. *J Health Econ.* 2002; 21(2):271–92. Epub 2002/04/10. S0167-6296(01)00130-8. PMID: [11939242](https://pubmed.ncbi.nlm.nih.gov/11939242/).
  20. Hoi le V, Chuc NT, Lindholm L. Health-related quality of life, and its determinants, among older people in rural Vietnam. *BMC Public Health.* 2010; 10:549. Epub 2010/09/14. 1471-2458-10-549. doi: [10.1186/1471-2458-10-549](https://doi.org/10.1186/1471-2458-10-549) PMID: [20831822](https://pubmed.ncbi.nlm.nih.gov/20831822/); PubMed Central PMCID: PMC2944376.
  21. Wee HL, Cheung YB, Fong KY, Luo N, Machin D, Thumboo J. Are English- and Chinese-language versions of the SF-6D equivalent? A comparison from a population-based study. *Clin Ther.* 2004; 26(7):1137–48. Epub 2004/09/01. S0149291804901865. PMID: [15336479](https://pubmed.ncbi.nlm.nih.gov/15336479/).
  22. Chong CA, Li S, Nguyen GC, Sutton A, Levy MH, Butler T, et al. Health-state utilities in a prisoner population: a cross-sectional survey. *Health Qual Life Outcomes.* 2009; 7:78. Epub 2009/09/01. 1477-7525-7-78. doi: [10.1186/1477-7525-7-78](https://doi.org/10.1186/1477-7525-7-78) PMID: [19715571](https://pubmed.ncbi.nlm.nih.gov/19715571/); PubMed Central PMCID: PMC2741437.
  23. Ekwunife OI, Aguwa CN, Adibe MO, Barikpaoar E, Onwuka CJ. Health state utilities of a population of Nigerian hypertensive patients. *BMC Res Notes.* 2011; 4:528. Epub 2011/12/14. 1756-0500-4-528. doi: [10.1186/1756-0500-4-528](https://doi.org/10.1186/1756-0500-4-528) PMID: [22152124](https://pubmed.ncbi.nlm.nih.gov/22152124/); PubMed Central PMCID: PMC3253720.
  24. Sazlina SG, Zaiton A, Nor Afiah MZ, Hayati KS. Predictors of health related quality of life in older people with non-communicable diseases attending three primary care clinics in Malaysia. *J Nutr Health Aging.* 2012; 16(5):498–502. Epub 2012/05/05. PMID: [22555798](https://pubmed.ncbi.nlm.nih.gov/22555798/).
  25. Konerman M, Weeks KR, Shands JR, Tilburt JC, Dy S, Bone LR, et al. Short Form (SF-36) Health Survey measures are associated with decreased adherence among urban African Americans with severe, poorly controlled hypertension. *J Clin Hypertens (Greenwich).* 2011; 13(5):385–90. Epub 2011/05/07. doi: [10.1111/j.1751-7176.2010.00402.x](https://doi.org/10.1111/j.1751-7176.2010.00402.x) PMID: [21545400](https://pubmed.ncbi.nlm.nih.gov/21545400/); PubMed Central PMCID: PMC3090746.
  26. Qian Y, Zhang J, Lin Y, Dong M, Xu M, Wu L, et al. A tailored target intervention on influence factors of quality of life in Chinese patients with hypertension. *Clin Exp Hypertens.* 2009; 31(1):71–82. Epub 2009/01/28. 908188270. doi: [10.1080/10641960802409804](https://doi.org/10.1080/10641960802409804) PMID: [19172461](https://pubmed.ncbi.nlm.nih.gov/19172461/).
  27. Carvalho MV, Siqueira LB, Sousa AL, Jardim PC. The influence of hypertension on quality of life. *Arq Bras Cardiol.* 2013; 100(2):164–74. Epub 2013/03/19. S0066-782X2013000200009. PMID: [23503826](https://pubmed.ncbi.nlm.nih.gov/23503826/).
  28. Johnson JA, Luo N, Shaw JW, Kind P, Coons SJ. Valuations of EQ-5D health states: are the United States and United Kingdom different? *Med Care.* 2005; 43(3):221–8. Epub 2005/02/24. 00005650-200503000-00004. PMID: [15725978](https://pubmed.ncbi.nlm.nih.gov/15725978/).
  29. Havranek EP, Steiner JF. Valuation of health states in the US versus the UK: two measures divided by a common language? *Med Care.* 2005; 43(3):201–2. Epub 2005/02/24. 00005650-200503000-00002. PMID: [15725976](https://pubmed.ncbi.nlm.nih.gov/15725976/).
  30. Leger D, Morin CM, Uchiyama M, Hakimi Z, Cure S, Walsh JK. Chronic insomnia, quality-of-life, and utility scores: comparison with good sleepers in a cross-sectional international survey. *Sleep medicine.* 2012; 13(1):43–51. doi: [10.1016/j.sleep.2011.03.020](https://doi.org/10.1016/j.sleep.2011.03.020) PMID: [22093806](https://pubmed.ncbi.nlm.nih.gov/22093806/).
